# Supplementary material for: Theoretical prediction of nanomolar and sequence-selective binding of synthetic supramolecular cucurbit[7]uril to N-terminal Leu-containing tripeptides
Source: Royal Society of Chemistry journal article supplement (doi:10.1039/d2cp03818h), 2023-01-01
Supplement: d2cp03818h1.pdf [file d2cp03818h1.pdf]

# Electronic Supplementary Information

## **A theoretical study on Sequence-dependent nanomolar binding of tripeptides containing N-terminal Leucine by Cucurbit[7]uril**

Ying Zhao<sup>1</sup>, Fei Li<sup>2</sup>, Fenfen Ma<sup>3</sup>, Junge Zhi<sup>1</sup>, Guanglu Wu<sup>2,\*</sup>, Xiaoyan Zheng<sup>1,4,\*</sup>

<sup>1</sup> Key Laboratory of Cluster Science of Ministry of Education, Beijing Key Laboratory of Photoelectronic/Electro-photonic Conversion Materials, School of Chemistry and Chemical Engineering, Beijing Institute of Technology, Beijing, 100081, China.

<sup>2</sup> State Key Laboratory of Supramolecular Structure and Materials, College of Chemistry, Jilin University, Changchun, 130012, China

<sup>3</sup> GuSu Laboratory of Materials, Suzhou 215123, Jiangsu, China.

<sup>4</sup> Guangdong Provincial Key Laboratory of Luminescence from Molecular Aggregates (South China University of Technology), Guangzhou 510640, China

\*E-mail: xiaoyanzheng@bit.edu.cn, guanglu@jlu.edu.cn

# Contents

## I. Supplementary method

Details of Independent Gradient Method (IGM) analysis

Isothermal Titration Calorimetry (ITC)

## II. Supplementary Figures S1-S5

**Figure S1** The chemical structural formulas of 17 tripeptides.

**Figure S2** The equilibrium structures of CB[7]/tripeptide complexes.

**Figure S3** The partial IGM isosurface analysis of CB[7]/LGX.

**Figure S4** The entropy variations of the host and guest molecules.

**Figure S5** The IGM isosurface analysis of CB[7]/IGX.

**Figure S6-S8** Isothermal Titration Calorimetry Data for three systems.

## III. Supplementary Tables S1-S4

**Table S1** Thermodynamic parameters for comparing the binding of CB[7] to LGX with that to LXG.

**Table S2** Thermodynamic parameters for comparing the binding of CB[7] to LGX with that to LGGX.

**Table S3** Thermodynamic parameters for comparing the binding of CB[7] to LGX with that to IGX.

**Table S4** Thermodynamic parameters of CB[7] binding with tripeptide containing N-terminal aromatic AAs.

**Table S5** Thermodynamic data of three systems on experiment compared with theoretical values.

## I. Supplementary method

### Details of Independent Gradient Method (IGM) analysis

The Independent Gradient Method (IGM)<sup>1</sup> method performed by Multiwfn 3.8 program<sup>2</sup> can estimate the noncovalent interactions between host CB[7] and guest molecules.  $\delta g^{\text{inter}} = |\nabla \rho^{\text{IGM, inter}}| - |\nabla \rho|$  is the key descriptor in IGM, which depends on the magnitude of the norm of the electron density gradient calculated by IGM model  $\nabla \rho^{\text{IGM, inter}}$  and the electron density gradient  $\nabla \rho$ . Besides,  $\delta g^{\text{inter}}$  represents the  $\delta g$  function in intermolecular regions which can depict the intermolecular interactions. The strong attractive/repulsive interaction and vdW interaction are shown in blue/red and green, severally. The volume cutoff is set as follows:  $\delta g^{\text{inter}} = 0.01$ , and other key settings are the program's default settings in all systems.

### Reference

1. Lefebvre, C.; Rubez, G.; Khartabil, H.; Boisson, J.-C.; Contreras-García, J.; Hénon, E., Accurately extracting the signature of intermolecular interactions present in the NCI plot of the reduced density gradient versus electron density. *Physical Chemistry Chemical Physics* **2017**, *19* (27), 17928-17936.
2. Lu, T.; Chen, F., Multiwfn: A multifunctional wavefunction analyzer. *Journal of Computational Chemistry* **2012**, *33* (5), 580-592.

### Isothermal Titration Calorimetry (ITC)

ITC experiments were carried out with a MicroCal iTC200 at 298.15 K to study the binding force between CB[7] and three different tripeptides (LGG, LGH, and LGK) in aqueous solution. Concentration of CB[7] was calibrated by a titration with 1-adamantanamine of known concentration. Twenty-six injections were performed with 90-second spacing time. The titration traces were integrated by NITPIC, which produced thermograms for further fitting in SEDFHAT. Two individual titrations were carried out for each peptide and a global fitting over the two repeated experiments was performed using the single-site model. The final figures were generated using GUSI.

## II. Supplementary Figures S1-S5

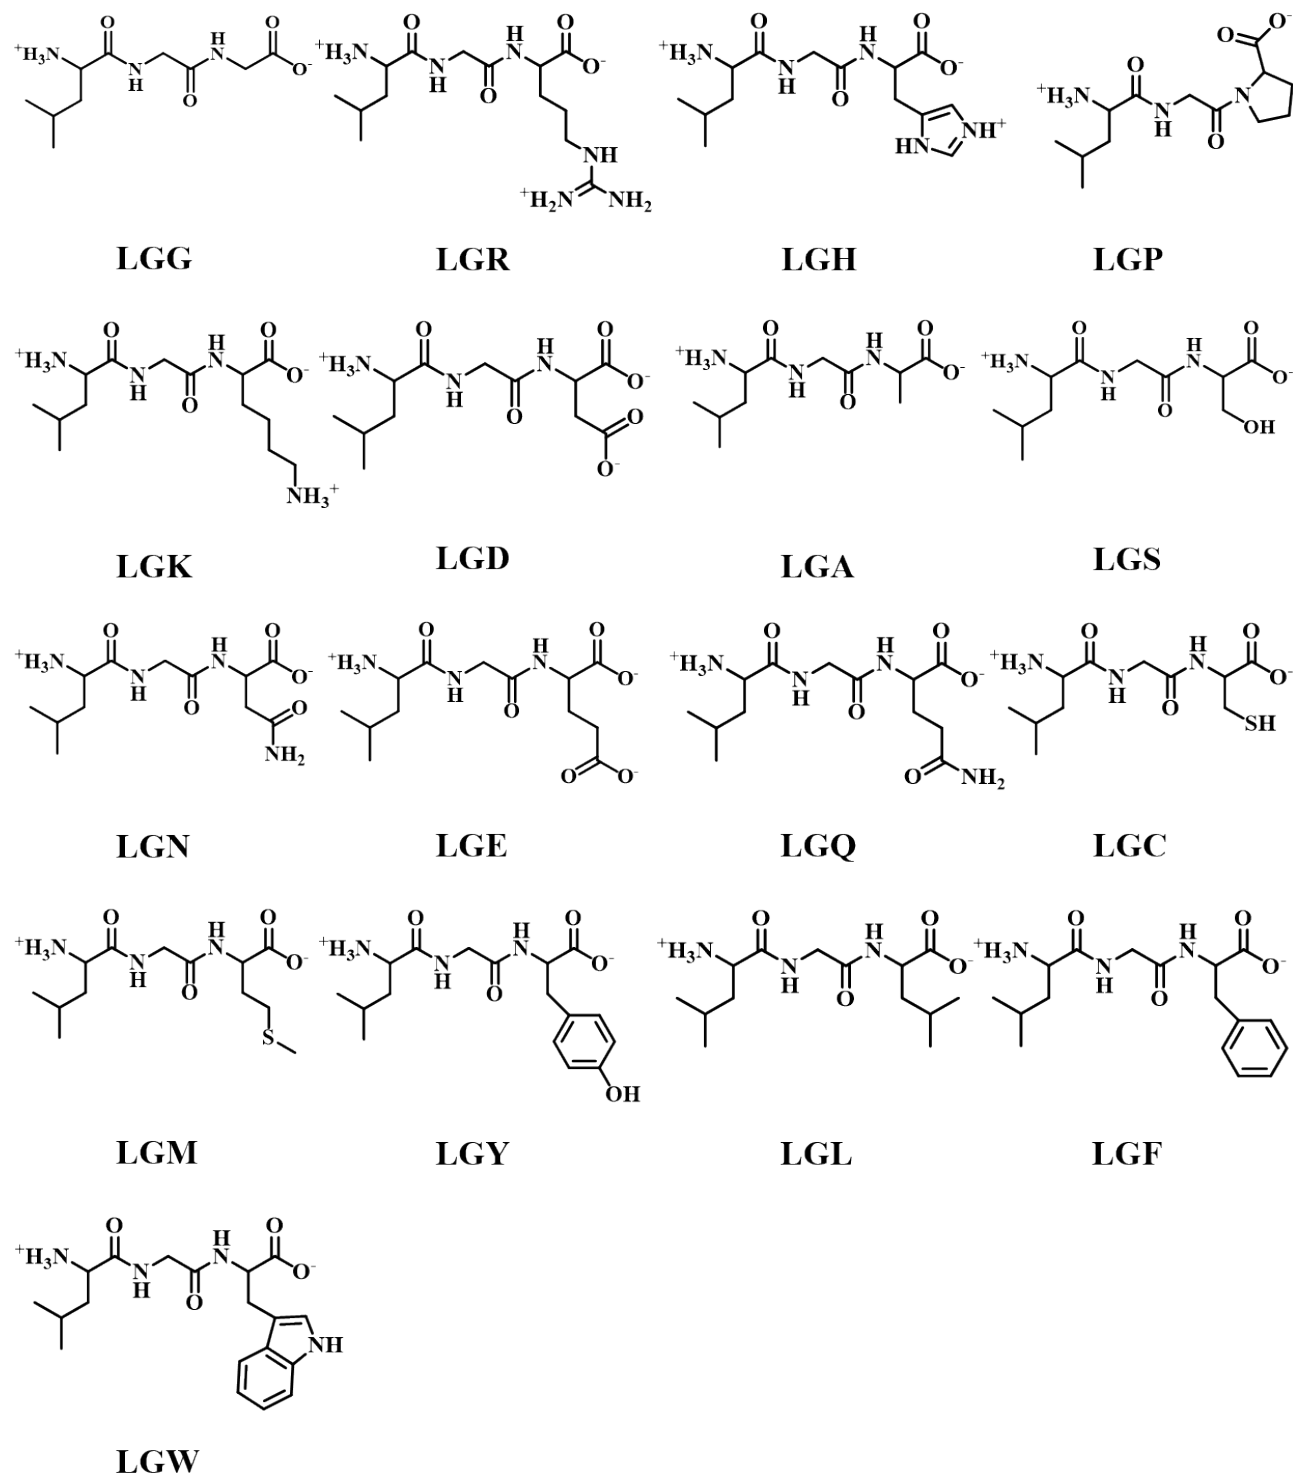

**Figure S1** The chemical structural formulas of 17 tripeptides.

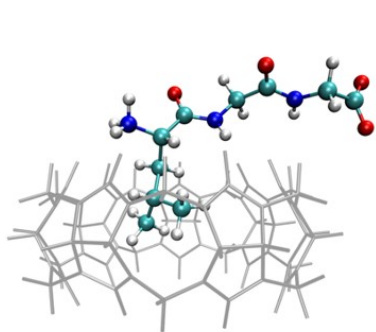

**CB[7]/LGG**

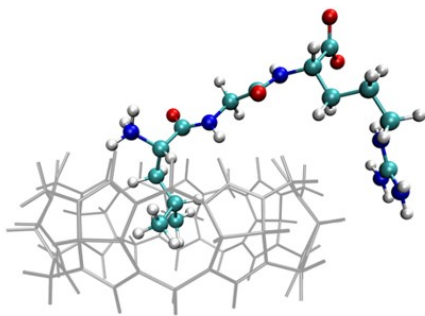

**CB[7]/LGR**

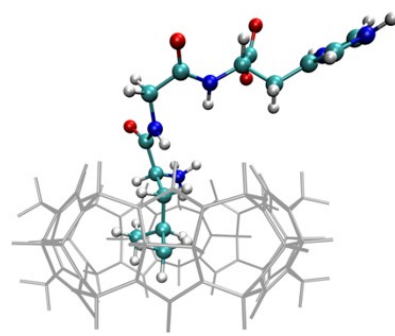

**CB[7]/LGH**

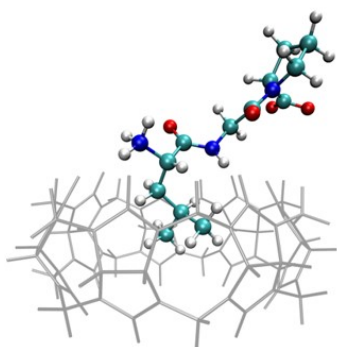

**CB[7]/LGP**

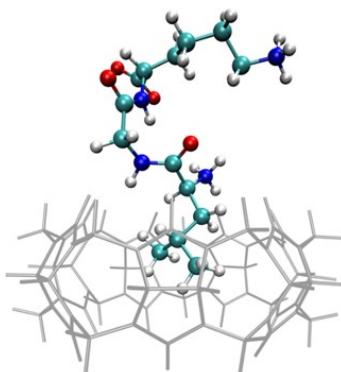

**CB[7]/LGK**

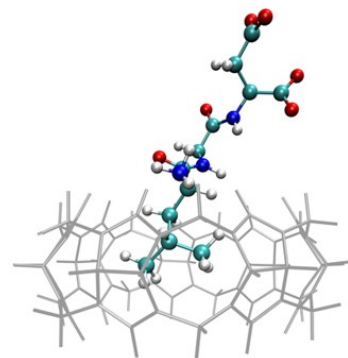

**CB[7]/LGD**

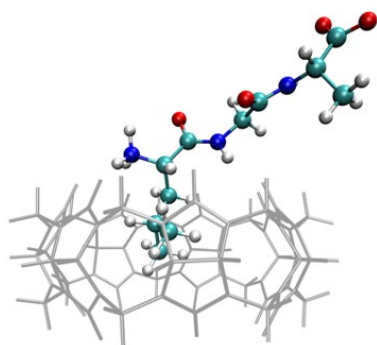

**CB[7]/LGA**

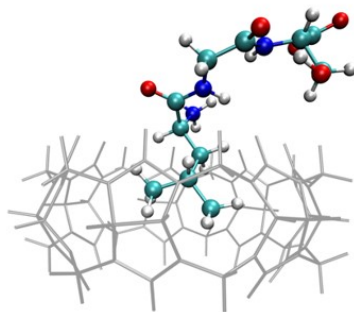

**CB[7]/LGS**

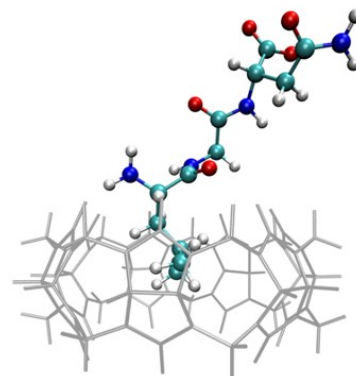

**CB[7]/LGN**

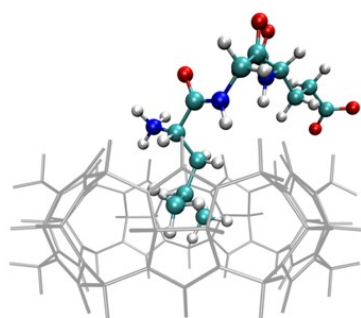

**CB[7]/LGE**

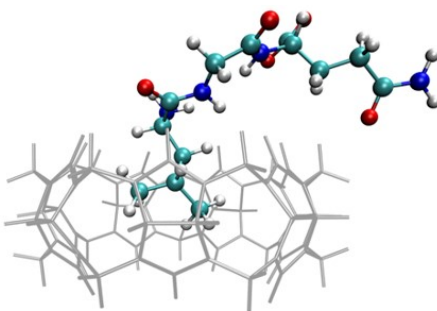

**CB[7]/LGQ**

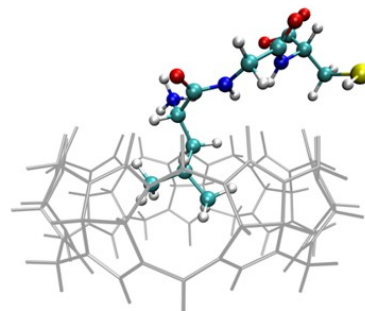

**CB[7]/LGC**

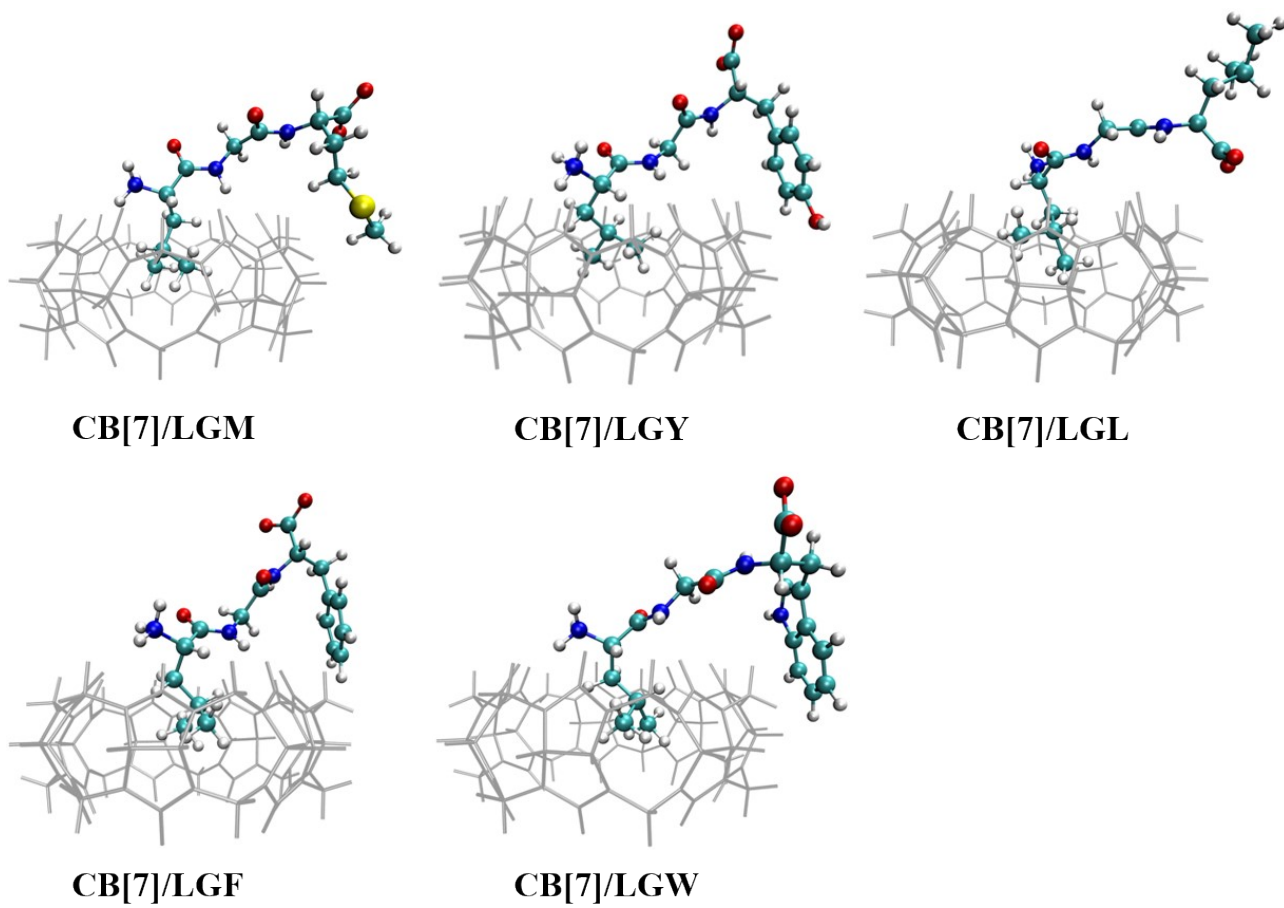

**Figure S2** The equilibrated structures of CB[7]/tripeptide complexes after MD simulation. Color codes: cyan refers to C; white refers to H; red refers to O; blue refers to N.

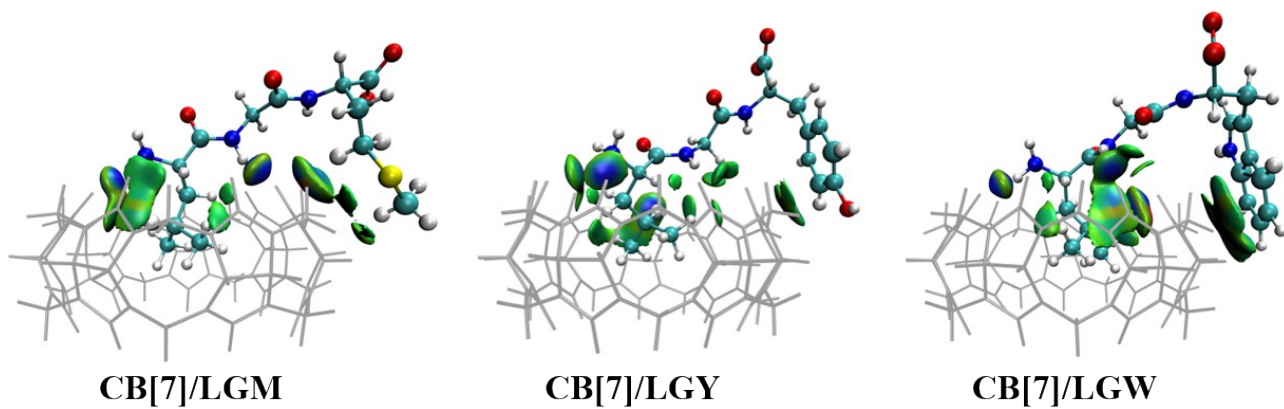

**Figure S3** IGM isosurface analysis of LGM, LGY and CB[7]/LGW.

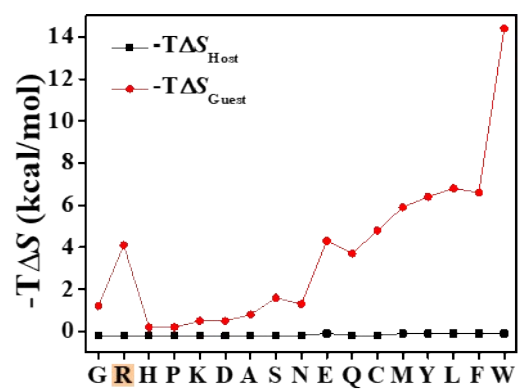

**Figure S4** The entropy variations of the host ( $-T\Delta S_{\text{Host}}$ ) and guest ( $-T\Delta S_{\text{Guest}}$ ) molecules.

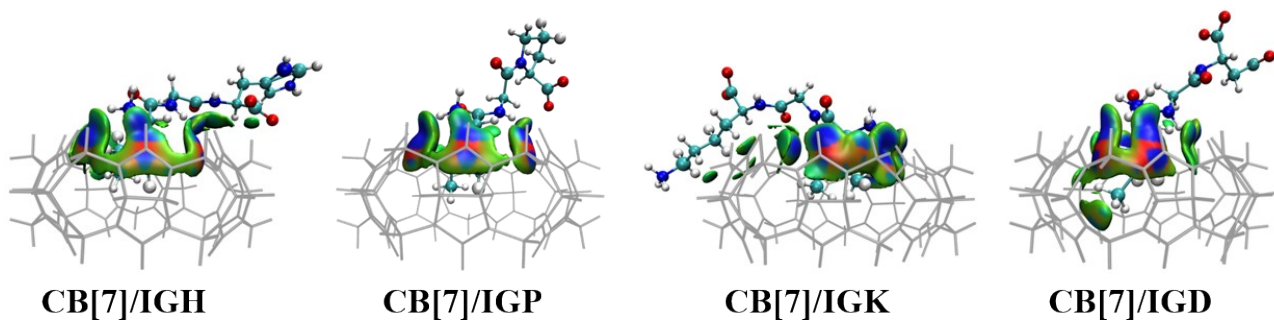

**Figure S5** IGM isosurface analysis of CB[7]/IGH, CB[7]/IGP, CB[7]/IGK and CB[7]/IGD.

### Thermodynamic parameters for binding between tripeptides and CB[7]

From ITC experiments, a series of thermodynamic parameters, including Gibbs free energy changes ( $\Delta G$ ), binding constant ( $K_a$ ), enthalpy changes ( $\Delta H$ ) and entropy changes ( $T\Delta S$ ), are obtained for the binding of each tripeptide with CB[7], as shown below in Figure S6-S8.

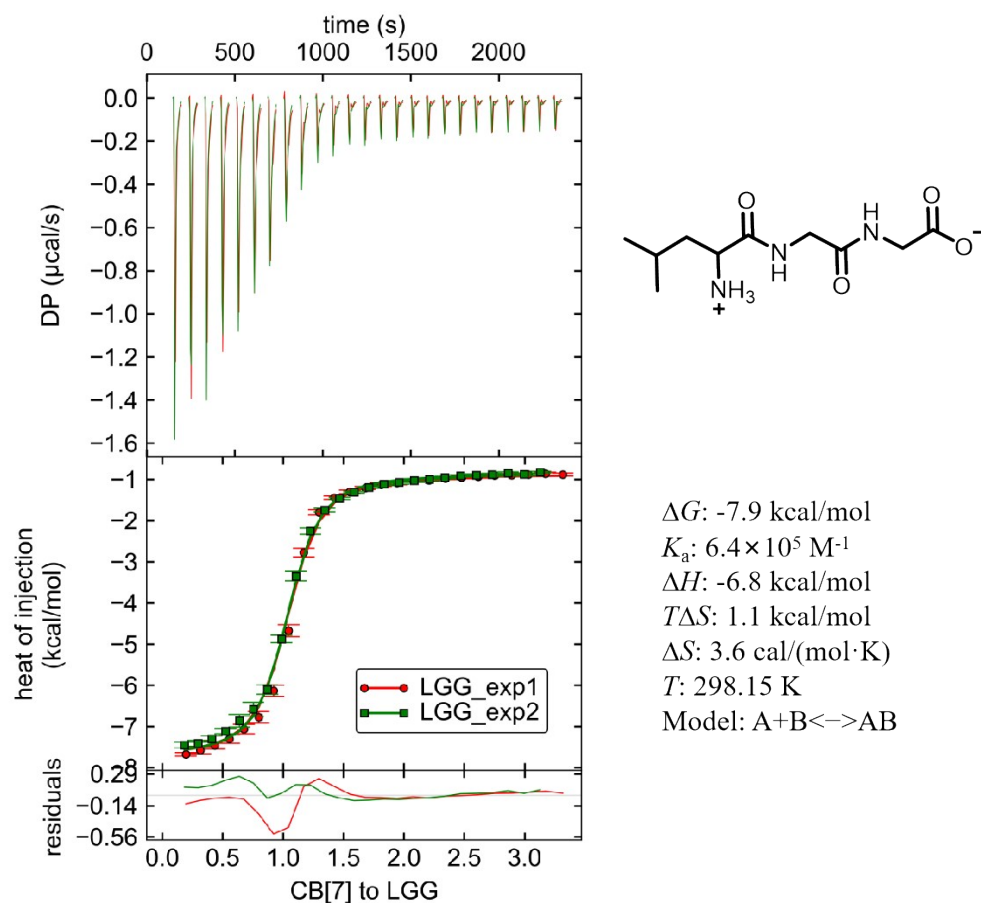

$\Delta G$ : -7.9 kcal/mol  
 $K_a$ :  $6.4 \times 10^5 \text{ M}^{-1}$   
 $\Delta H$ : -6.8 kcal/mol  
 $T\Delta S$ : 1.1 kcal/mol  
 $\Delta S$ : 3.6 cal/(mol·K)  
 $T$ : 298.15 K  
Model:  $A+B \rightleftharpoons AB$

**Figure S6** Thermogram at 298.15 K for the titration of CB[7] (1.3 mM) into LGG (0.08 mM or 0.09 mM) aqueous solutions.

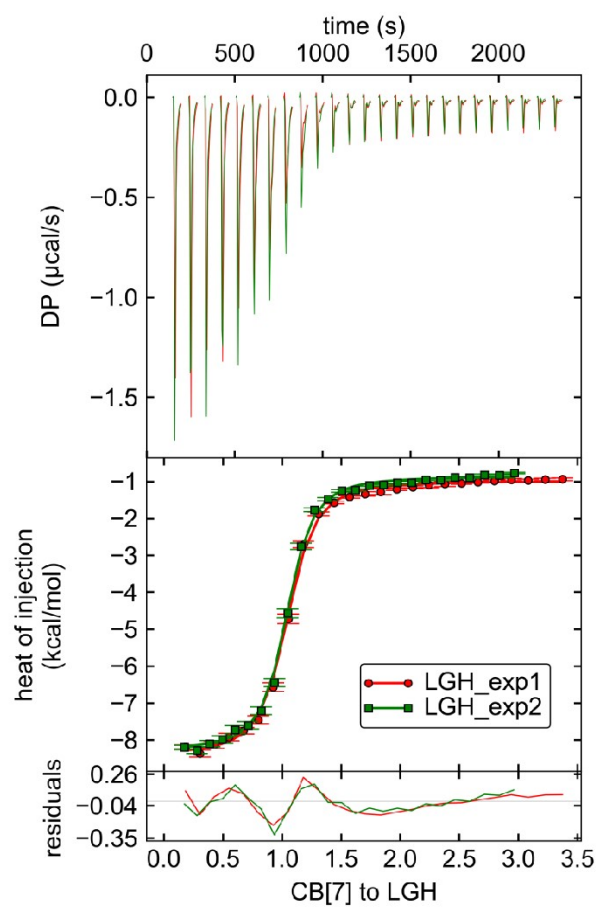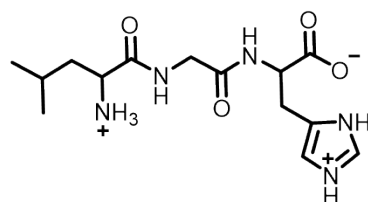

$\Delta G$ : -8.1 kcal/mol  
 $K_a$ :  $9.1 \times 10^5 \text{ M}^{-1}$   
 $\Delta H$ : -7.4 kcal/mol  
 $T\Delta S$ : 0.7 kcal/mol  
 $\Delta S$ : 2.4 cal/(mol·K)  
 $T$ : 298.15 K  
 Model:  $A+B \rightleftharpoons AB$

**Figure S7.** Thermogram at 298.15 K for the titration of CB[7] (1.3 mM) into LGH (0.08 mM or 0.09 mM) aqueous solutions.

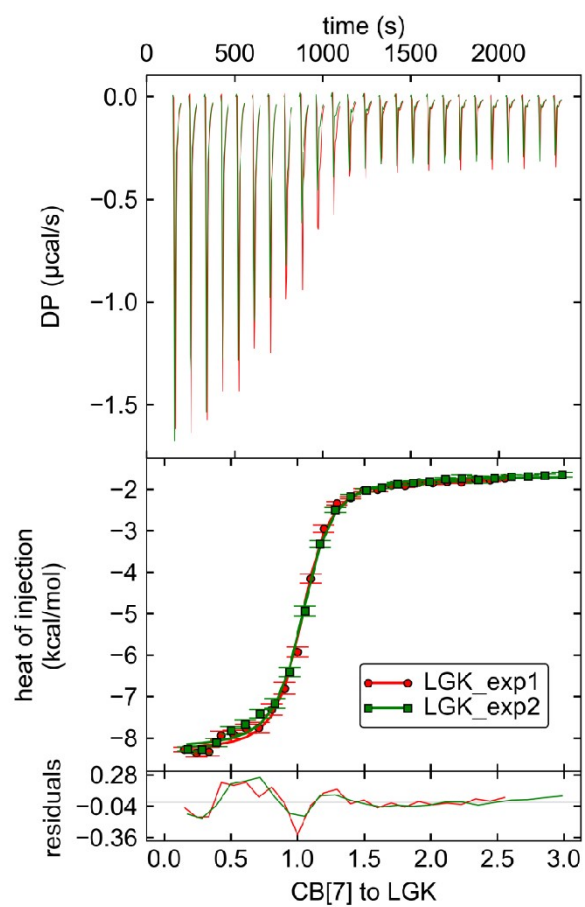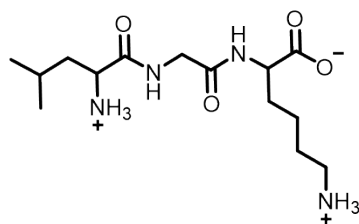

$\Delta G$ : -8.2 kcal/mol  
 $K_a$ :  $9.5 \times 10^5 \text{ M}^{-1}$   
 $\Delta H$ : -6.6 kcal/mol  
 $T\Delta S$ : 1.6 kcal/mol  
 $\Delta S$ : 5.4 cal/(mol·K)  
 $T$ : 298.15 K  
 Model:  $A+B \rightleftharpoons AB$

**Figure S8.** Thermogram at 298.15 K for the titration of CB[7] (1.3 mM) into LGK (0.11 mM or 0.09 mM) aqueous solutions.

### III. Supplementary Tables S1-S4

**Table S1** Thermodynamic parameters of binding free energy ( $\Delta G$ ), enthalpy ( $\Delta H$ ), and entropy ( $-T\Delta S$ ) in kcal/mol as well as the binding constant  $K_a$  in  $M^{-1}$  for comparing the binding of CB[7] to LGX with that to LXG (X = R, H, P, K and D).

|           | $\Delta G$ | $K_a$                               | $\Delta H$   | $-T\Delta S$ |
|-----------|------------|-------------------------------------|--------------|--------------|
| CB[7]/LGR | -12.4      | <b><math>1.1 \times 10^9</math></b> | <b>-16.3</b> | 3.9          |
| CB[7]/LRG | -9.5       | <b><math>8.3 \times 10^6</math></b> | <b>-9.8</b>  | 0.3          |
| CB[7]/LGH | -9.3       | $6.0 \times 10^6$                   | -9.3         | 0            |
| CB[7]/LHG | -5.8       | $1.7 \times 10^4$                   | -9.8         | 4.0          |
| CB[7]/LGP | -8.8       | <b><math>2.6 \times 10^6</math></b> | -8.8         | <b>0</b>     |
| CB[7]/LPG | -2.6       | <b>78.4</b>                         | -7.9         | <b>5.3</b>   |
| CB[7]/LGK | -8.5       | $1.6 \times 10^6$                   | -8.8         | 0.3          |
| CB[7]/LKG | -7.3       | $2.1 \times 10^5$                   | -9.8         | 2.5          |
| CB[7]/LGD | -8.5       | <b><math>1.6 \times 10^6</math></b> | -8.8         | <b>0.3</b>   |
| CB[7]/LDG | -4.4       | <b><math>1.6 \times 10^3</math></b> | -10.0        | <b>5.6</b>   |

**Table S2** Thermodynamic parameters of binding free energy ( $\Delta G$ ), enthalpy ( $\Delta H$ ), and entropy ( $-T\Delta S$ ) in kcal/mol as well as the binding constant  $K_a$  in  $M^{-1}$  for comparing the binding of CB[7] to LGX with that to LGGX (X = R, H, P, K and D).

|            | $\Delta G$ | $K_a$                               | $\Delta H$   | $-T\Delta S$ |
|------------|------------|-------------------------------------|--------------|--------------|
| CB[7]/LGR  | -12.4      | <b><math>1.1 \times 10^9</math></b> | <b>-16.3</b> | 3.9          |
| CB[7]/LGGR | -7.6       | <b><math>3.4 \times 10^5</math></b> | <b>-9.3</b>  | 1.7          |
| CB[7]/LGH  | -9.3       | $6.0 \times 10^6$                   | -9.3         | 0            |
| CB[7]/LGGH | -6.6       | $6.4 \times 10^4$                   | -9.6         | 3.0          |
| CB[7]/LGP  | -8.8       | <b><math>2.6 \times 10^6</math></b> | -8.8         | <b>0</b>     |
| CB[7]/LGGP | -5.2       | <b><math>6.1 \times 10^3</math></b> | -9.6         | <b>4.4</b>   |
| CB[7]/LGK  | -8.5       | $1.6 \times 10^6$                   | -8.8         | 0.3          |
| CB[7]/LGGK | -8.1       | $8.0 \times 10^5$                   | -9.3         | 1.2          |
| CB[7]/LGD  | -8.5       | $1.6 \times 10^6$                   | -8.8         | 0.3          |
| CB[7]/LGGD | -6.9       | $1.1 \times 10^5$                   | -10.0        | 3.1          |

**Table S3** Thermodynamic parameters of binding free energy ( $\Delta G$ ), enthalpy ( $\Delta H$ ), and entropy ( $-T\Delta S$ ) in kcal/mol as well as the binding constant  $K_a$  in  $M^{-1}$  for comparing the binding of CB[7] to LGX with that to IGX (X = R, H, P, K and D).

|           | $\Delta G$ | $K_a$                                  | $\Delta H$ | $-T\Delta S$ |
|-----------|------------|----------------------------------------|------------|--------------|
| CB[7]/LGR | -12.4      | $1.1 \times 10^9$                      | -16.3      | 3.9          |
| CB[7]/IGR | -2.4       | <b>56.0</b>                            | -8.4       | 6.0          |
| CB[7]/LGH | -9.3       | $6.0 \times 10^6$                      | -9.3       | 0            |
| CB[7]/IGH | -4.4       | <b><math>1.6 \times 10^3</math></b>    | -7.6       | 3.2          |
| CB[7]/LGP | -8.8       | $2.6 \times 10^6$                      | -8.8       | 0            |
| CB[7]/IGP | 0.2        | <b><math>7.1 \times 10^{-1}</math></b> | -7.9       | 8.1          |
| CB[7]/LGK | -8.5       | $1.6 \times 10^6$                      | -8.8       | 0.3          |
| CB[7]/IGK | -2.2       | <b>40.1</b>                            | -7.2       | 5.0          |
| CB[7]/LGD | -8.5       | $1.6 \times 10^6$                      | -8.8       | 0.3          |
| CB[7]/IGD | 0.6        | <b><math>3.7 \times 10^{-1}</math></b> | -7.9       | 8.5          |

**Table S4** Thermodynamic parameters of CB[7] binding with tripeptide containing N-terminal aromatic AAs, including  $\Delta G$ ,  $\Delta H$ ,  $-T\Delta S$  in kcal/mol as well as the binding constant  $K_a$  in  $M^{-1}$ .

|           | $\Delta G$ | $K_a$                | $\Delta H$ | $-T\Delta S$ |
|-----------|------------|----------------------|------------|--------------|
| CB[7]/FGG | -5.7       | $1.4 \times 10^4$    | -12.4      | 6.7          |
| CB[7]/FGE | -12.8      | $2.1 \times 10^9$    | -19.6      | 6.8          |
| CB[7]/FGK | -11.9      | $4.7 \times 10^8$    | -18.2      | 6.3          |
| CB[7]/FGR | -11.6      | $2.8 \times 10^8$    | -18.4      | 6.8          |
| CB[7]/FGH | -10.2      | $4.7 \times 10^7$    | -17.2      | 7.0          |
| CB[7]/FGS | -3.6       | $4.2 \times 10^2$    | -12.5      | 8.9          |
| CB[7]/FGL | -2.9       | $1.3 \times 10^2$    | -11.7      | 8.8          |
| CB[7]/FGD | -2.3       | $4.7 \times 10$      | -12.6      | 10.3         |
| CB[7]/FGQ | -1.8       | $2.1 \times 10$      | -13.1      | 11.3         |
| CB[7]/FGM | -1.3       | 8.9                  | -12.5      | 11.2         |
| CB[7]/FGY | 0.4        | 0.5                  | -13.5      | 13.9         |
| CB[7]/WGG | -9.1       | $4.5 \times 10^6$    | -12.4      | 3.3          |
| CB[7]/WGR | -15.1      | $9.5 \times 10^{10}$ | -18.2      | 3.1          |
| CB[7]/WGK | -3.0       | $1.4 \times 10^2$    | -11.7      | 8.7          |
| CB[7]/WGH | -6.5       | $5.4 \times 10^4$    | -12.0      | 5.5          |
| CB[7]/YGG | -4.9       | $3.7 \times 10^3$    | -11.5      | 6.6          |
| CB[7]/YGR | -14.9      | $7.0 \times 10^{10}$ | -17.0      | 2.1          |
| CB[7]/YGK | -15.4      | $1.7 \times 10^{11}$ | -16.7      | 1.3          |
| CB[7]/YGH | -7.8       | $4.8 \times 10^5$    | -10.0      | 2.2          |

**Table S5** Thermodynamic data of three systems on experiment compared with theoretical values, including  $\Delta G$ ,  $\Delta H$ ,  $-T\Delta S$  in kcal/mol as well as the binding constant  $K_a$  in  $M^{-1}$ .

|     | $\Delta G$ |      | $K_a$           |                 | $\Delta H$ |      | $-T\Delta S$ |      |
|-----|------------|------|-----------------|-----------------|------------|------|--------------|------|
|     | Cal.       | Exp. | Cal.            | Exp.            | Cal.       | Exp. | Cal.         | Exp. |
| LGG | -8.1       | -7.9 | $8.0\times10^5$ | $6.4\times10^5$ | -9.1       | -6.8 | 1.0          | -1.1 |
| LGH | -9.3       | -8.1 | $6.0\times10^6$ | $9.1\times10^5$ | -9.3       | -7.4 | 0            | -0.7 |
| LGK | -8.5       | -8.2 | $1.6\times10^6$ | $9.5\times10^5$ | -8.8       | -6.6 | 0.3          | -1.6 |
